# Supplementary material
Source: publisher figshare collection journal article supplement (https://acs.figshare.com/ndownloader/files/13665809)
Supplement: Supplementary file 1 [file 13665809]

## SUPPORTING INFORMATION

# Heteroleptic Copper(I) Complexes Prepared from Phenanthroline and Bis-Phosphine Ligands: Rationalization of the Photophysical and Electrochemical Properties

Enrico Leoni,<sup>§,‡</sup> John Mohanraj,<sup>§</sup> Michel Holler,<sup>†</sup> Meera Mohankumar,<sup>†</sup> Iwona Nierengarten,<sup>†</sup> Filippo Monti,<sup>\*,§</sup> Alix Sournia-Saquet,<sup>‡</sup> Béatrice Delavaux-Nicot,<sup>\*,‡</sup> Jean-François Nierengarten,<sup>\*,†</sup> and Nicola Armaroli<sup>\*,§</sup>

<sup>§</sup>Istituto per la Sintesi Organica e la Fotoreattività, Consiglio Nazionale delle Ricerche, Via Gobetti 101, 40129 Bologna, Italy

<sup>†</sup>Laboratoire de Chimie des Matériaux Moléculaires, Université de Strasbourg et CNRS (LIMA – UMR 7042), 25 rue Becquerel, 67087 Strasbourg Cedex 2, France

<sup>‡</sup>Laboratoire de Chimie de Coordination du CNRS (UPR 8241), Université de Toulouse (UPS, INPT), 205 Route de Narbonne, 31077 Toulouse Cedex 4, France

<sup>\*</sup>Laboratorio Tecnologia dei Materiali Faenza, ENEA, Via Ravegnana 186, 48018 Faenza (RA), Italy

|                                                                                                                |          |
|----------------------------------------------------------------------------------------------------------------|----------|
| 1. Structural parameters: comparison between crystallographic and DFT data                                     | Page S2  |
| 2. Kohn–Sham frontier molecular orbitals                                                                       | Page S7  |
| 3. Comparison between CV redox potentials and DFT HOMO-LUMO energies of the [Cu(phen)(PP)] <sup>+</sup> series | Page S8  |
| 4. OWSV voltammograms                                                                                          | Page S8  |
| 5. Stability of the complexes in CH <sub>2</sub> Cl <sub>2</sub> solution                                      | Page S9  |
| 6. Correlation between MLCT absorption to PP bite angle                                                        | Page S11 |
| 7. Photophysical data and luminescence spectra in CH <sub>2</sub> Cl <sub>2</sub> (r.t. and 77 K)              | Page S12 |
| 8. Solid state luminescence spectra (PMMA and powders)                                                         | Page S13 |
| 9. Key structural parameters of fully-optimized complexes (singlet and triplet)                                | Page S16 |
| 10. Solid state luminescence spectra as a function of temperature                                              | Page S18 |
| 11. Temperature-dependent excited-state lifetimes                                                              | Page S21 |

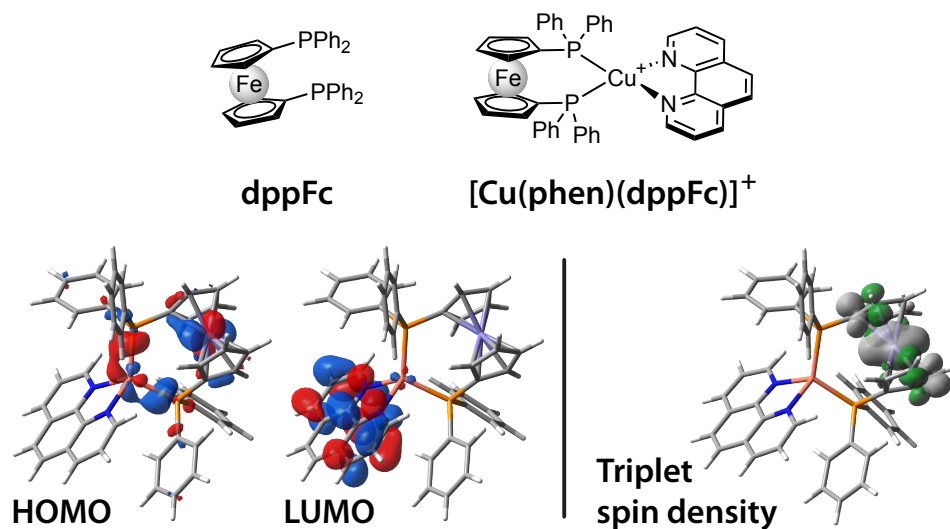

**Figure S1.** Top: chemical structure of the dppFc ligand and of the related [Cu(phen)(dppFc)]<sup>+</sup> complex. Bottom: (right) HOMO and LUMO of the complex; (left) spin density distribution of the lowest triplet excited state. Isosurfaces: 0.04 e<sup>1/2</sup> bohr<sup>-3/2</sup> (for orbitals) and 0.002 e bohr<sup>-3</sup> (for densities).

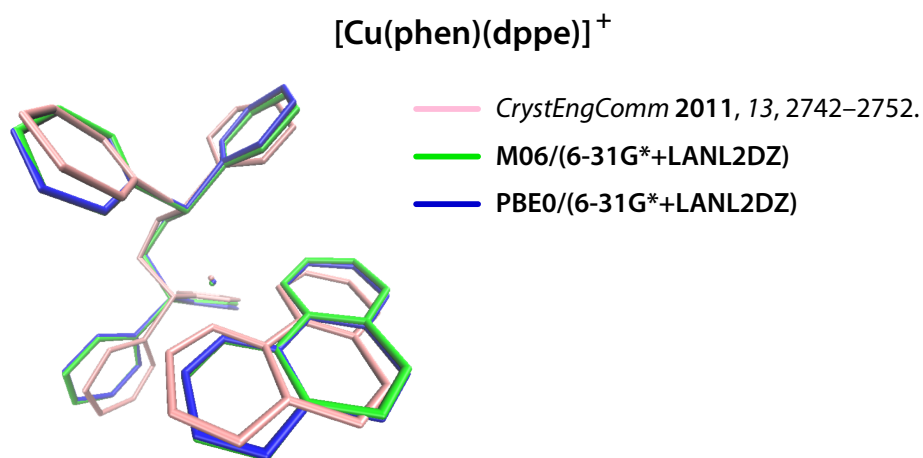

**Figure S2.** Superimposition of different experimental and theoretical structures of [Cu(phen)(dppe)]<sup>+</sup>. All structures are superimposed by minimizing the root-mean-square deviation (RMSD) of all atomic positions; hydrogen atoms are excluded from the statistic and omitted in the figure. All RMSD calculations, optimizations and visualizations were performed by VMD 1.9.1.

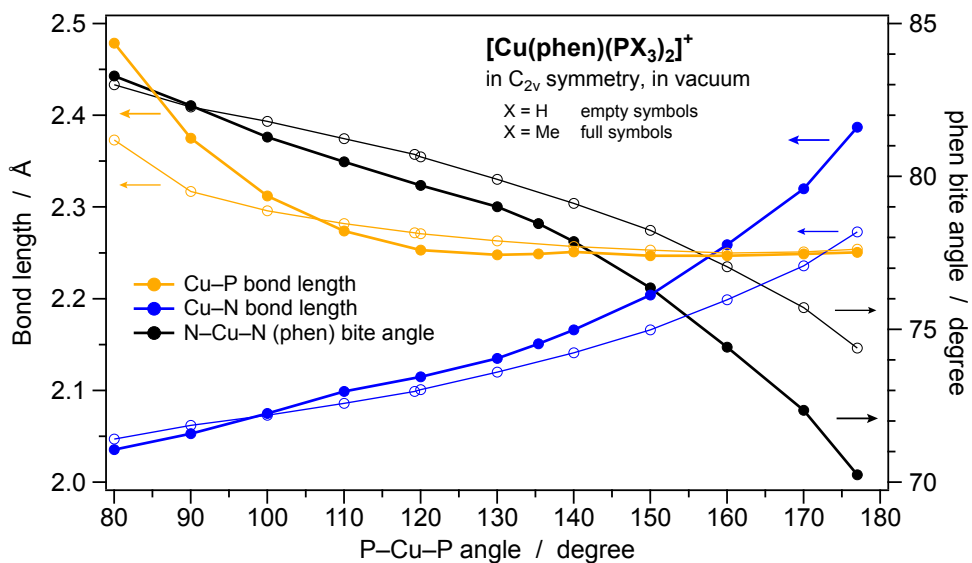

**Figure S3.** Key structural parameters of the model compounds  $[\text{Cu}(\text{phen})(\text{PX}_3)_2]^+$  (where  $\text{X} = \text{H}$  or  $\text{CH}_3$ ). Data refer to relaxed scans of the P–Cu–P bite angles within an imposed  $\text{C}_{2v}$ -symmetry constraint. Calculations are performed at the M06 level of theory in vacuum (see Experimental Section for further details). It should be emphasized that, due to the forced steric hindrance of the phosphine ligands within the imposed  $\text{C}_{2v}$  symmetry, a spurious elongation of the Cu–P bonds is observed at small P–Cu–P angles; accordingly, the phenomenon is more pronounced for the bulkier  $\text{PMe}_3$  ligand, respect to the smaller  $\text{PH}_3$  ones.

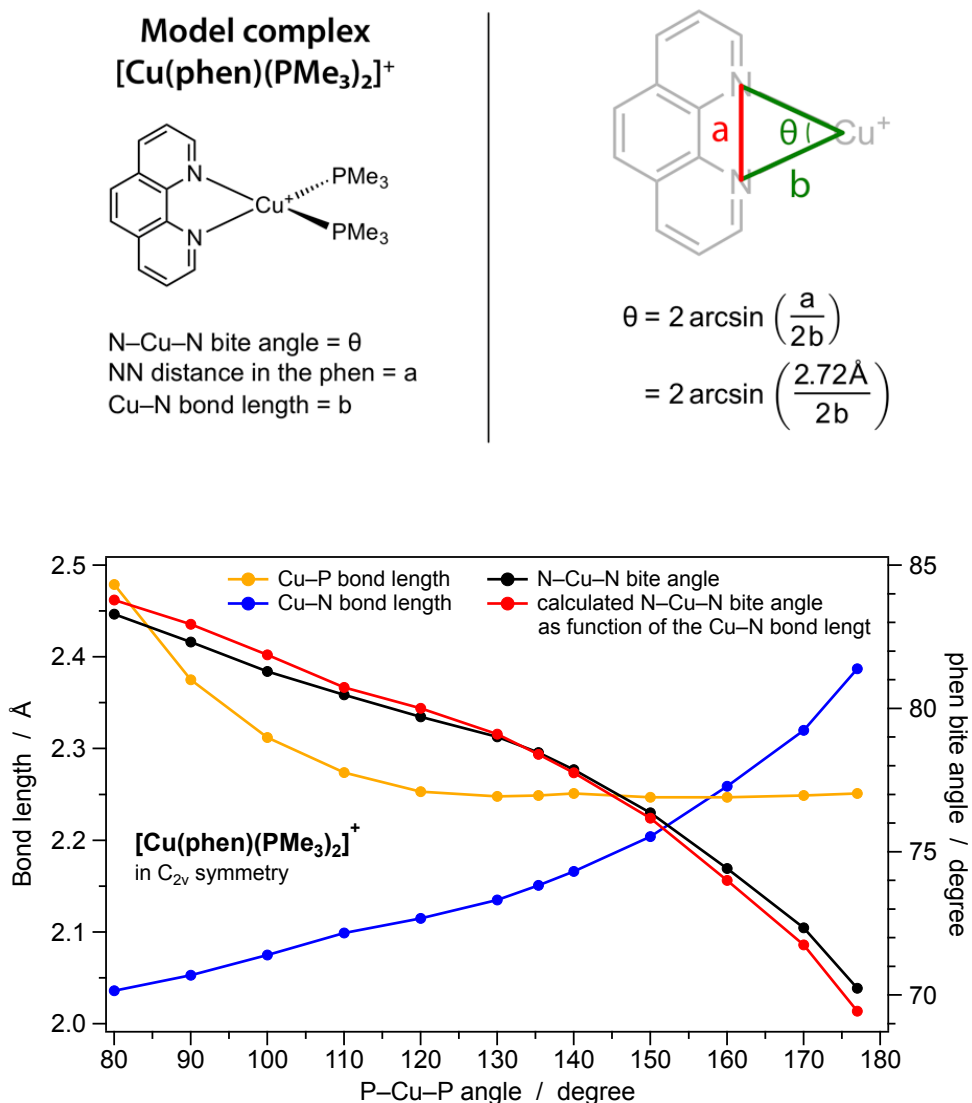

**Figure S4.** Top: Trigonometric derivation of the mathematical function relating the phenanthroline N–Cu–N bite angle to the corresponding Cu–N bond length. Bottom: Calculated N–Cu–N bite angles (red line and dots) as function of the Cu–N bond length (assuming constant the distance between nitrogens – 2.72 Å – upon variation of the P–Cu–P angle); predicted data are compared to the real ones obtained by DFT calculations (black line and dots).

**Table S1.** Key structural parameters of the complexes belonging to the  $[\text{Cu}(\text{phen})(\text{PP})]^+$  series (where PP = dppb, dppe, POP and  $\mu$ -dppm). Data are taken from X-ray crystal structures reported in literature and available through the Cambridge Crystallographic Data Center (CCDC). In bold are reported the mean values of the structural parameters taken from the different available conformer.

| Type of PP ligand            | Cu–N bond lengths [Å] | Cu–P bond lengths [Å] | N–Cu–N angle [°]  | P–Cu–P angle [°]   | phen – PCuP dihedral angle [°] | CCDC number          | Literature citation                                        |
|------------------------------|-----------------------|-----------------------|-------------------|--------------------|--------------------------------|----------------------|------------------------------------------------------------|
| <b>dppb</b>                  | 2.040 – 2.049         | 2.238 – 2.249         | 81.92             | 88.11              | 85.58                          | 953017               | <i>Inorg. Chem.</i> , <b>2013</b> , 52, 12140–12151        |
|                              | 2.038 – 2.053         | 2.240 – 2.257         | 81.99             | 87.14              | 87.37                          | 802648               | <i>J. Mater. Chem.</i> , <b>2011</b> , 21, 16108–16118     |
|                              | 2.059 – 2.063         | 2.260 – 2.280         | 81.06             | 86.96              | 87.84                          | 826035               | <i>Polyhedron</i> , <b>2012</b> , 35, 47–54                |
|                              | <b>2.05 ± 0.01</b>    | <b>2.25 ± 0.02</b>    | <b>81.7 ± 0.5</b> | <b>87.4 ± 0.6</b>  | <b>87 ± 1</b>                  |                      |                                                            |
| <b>dppe</b>                  | 2.041 – 2.042         | 2.239 – 2.245         | 82.46             | 91.57              | 82.76                          | 796689               | <i>CrystEngComm</i> , <b>2011</b> , 13, 2742–2752          |
|                              | <b>2.04 ± 0.01</b>    | <b>2.24 ± 0.04</b>    | <b>82.5</b>       | <b>91.2</b>        | <b>83</b>                      |                      |                                                            |
| <b>dppp</b>                  | 2.058 – 2.077         | 2.230 – 2.245         | 81.50             | 104.56             | 81.59                          | 844532 <sup>b</sup>  | <i>Acta Cryst.</i> , <b>2011</b> , 67, 1713–1714           |
|                              | 2.046 – 2.073         | 2.234 – 2.236         | 81.91             | 104.68             | 79.18                          | "                    | "                                                          |
|                              | 2.060 – 2.066         | 2.228 – 2.244         | 81.88             | 105.08             | 80.75                          | 899896 <sup>b</sup>  | <i>J. Mol. Struct.</i> , <b>2015</b> , 1085, 235–241       |
|                              | 2.057 – 2.086         | 2.232 – 2.239         | 81.27             | 104.77             | 77.74                          | "                    | "                                                          |
|                              | <b>2.07 ± 0.01</b>    | <b>2.24 ± 0.01</b>    | <b>81.6 ± 0.5</b> | <b>104.8 ± 0.4</b> | <b>80 ± 3</b>                  |                      |                                                            |
| <b>POP</b>                   | 2.063 – 2.071         | 2.231 – 2.261         | 80.83             | 110.81             | 87.66                          | 177684               | <i>Inorg. Chem.</i> , <b>2002</b> , 41, 3313–3322          |
|                              | 2.063 – 2.070         | 2.206 – 2.283         | 81.02             | 119.18             | 89.09                          | 802647               | <i>J. Mater. Chem.</i> , <b>2011</b> , 21, 16108–16118     |
|                              | 2.073 – 2.079         | 2.235 – 2.271         | 80.89             | 113.52             | 87.80                          | 224679               | <i>Eur. J. Inorg. Chem.</i> , <b>2005</b> , 10, 1867–1879  |
|                              | 2.054 – 2.079         | 2.195 – 2.270         | 81.59             | 117.50             | 88.63                          | 1498327 <sup>b</sup> | <i>Polyhedron</i> , <b>2017</b> , 124, 166–176             |
|                              | 2.055 – 2.109         | 2.195 – 2.270         | 80.85             | 117.50             | 89.52                          | "                    | "                                                          |
|                              | <b>2.07 ± 0.01</b>    | <b>2.24 ± 0.02</b>    | <b>81.0 ± 0.4</b> | <b>116 ± 4</b>     | <b>88 ± 1</b>                  |                      |                                                            |
| <b><math>\mu</math>-dppm</b> | 2.114 – 2.136         | 2.235 – 2.286         | 79.80             | 134.34             | 84.89                          | 1188267              | <i>Bull. Chem. Soc. Jpn.</i> , <b>1991</b> , 64, 2809–2813 |
|                              | 2.111 – 2.124         | 2.231 – 2.269         | 79.21             | 133.33             | 83.95                          | 296675               | <i>Acta Cryst.</i> , <b>2006</b> , 62, 111–112             |
|                              | 2.100 – 2.134         | 2.246 – 2.279         | 79.41             | 135.58             | 81.55                          | 198781               | <i>Transit. Metal Chem.</i> , <b>2003</b> , 28, 772–776.   |
|                              | 2.109 – 2.116         | 2.236 – 2.272         | 79.40             | 135.19             | 85.25                          | 1028806              | <i>J. Mol. Struct.</i> , <b>2015</b> , 1099, 351–358       |
|                              | <b>2.12 ± 0.01</b>    | <b>2.26 ± 0.02</b>    | <b>79.5 ± 0.4</b> | <b>134 ± 2</b>     | <b>84 ± 3</b>                  |                      |                                                            |

**Table S2.** Key structural parameters of the fully-optimized complexes belonging to the  $[\text{Cu}(\text{phen})(\text{PP})]^+$  series (where PP = dppb, dppe, POP and  $\mu$ -dppm). All the geometry optimizations were performed at the M06 level of theory in vacuum (see Experimental Section for further details). For the sake of comparison, the mean values of the same structural parameters taken from X-ray experimental data are reported in bold (from Table S1).

| Type of<br>PP ligand         | Cu–N<br>bond lengths<br>[Å]                        | Cu–P<br>bond lengths<br>[Å]                        | N–Cu–N<br>angle<br>[°]                   | P–Cu–P<br>angle<br>[°]                     | phen – PCuP<br>dihedral angle<br>[°] |
|------------------------------|----------------------------------------------------|----------------------------------------------------|------------------------------------------|--------------------------------------------|--------------------------------------|
| <b>dppb</b>                  | <b><math>2.05 \pm 0.01</math></b><br>2.072 – 2.087 | <b><math>2.25 \pm 0.02</math></b><br>2.271 – 2.284 | <b><math>81.7 \pm 0.5</math></b><br>81.0 | <b><math>87.4 \pm 0.6</math></b><br>86.9   | <b><math>87 \pm 1</math></b><br>85.5 |
| <b>dppe</b>                  | <b><math>2.04 \pm 0.01</math></b><br>2.059 – 2.093 | <b><math>2.24 \pm 0.04</math></b><br>2.265 – 2.283 | <b><math>82.5</math></b><br>81.2         | <b><math>91.2</math></b><br>91.6           | <b><math>83</math></b><br>72.8       |
| <b>dppp</b>                  | <b><math>2.07 \pm 0.01</math></b><br>2.078 – 2.103 | <b><math>2.24 \pm 0.01</math></b><br>2.238 – 2.273 | <b><math>81.6 \pm 0.5</math></b><br>80.6 | <b><math>104.8 \pm 0.4</math></b><br>101.8 | <b><math>80 \pm 3</math></b><br>85.1 |
| <b>POP</b>                   | <b><math>2.07 \pm 0.01</math></b><br>2.101 – 2.108 | <b><math>2.24 \pm 0.02</math></b><br>2.243 – 2.318 | <b><math>81.0 \pm 0.4</math></b><br>80.1 | <b><math>116 \pm 4</math></b><br>116.2     | <b><math>88 \pm 1</math></b><br>89.2 |
| <b><math>\mu</math>-dppm</b> | <b><math>2.12 \pm 0.01</math></b><br>2.141 – 2.157 | <b><math>2.26 \pm 0.02</math></b><br>2.255 – 2.286 | <b><math>79.5 \pm 0.4</math></b><br>78.5 | <b><math>134 \pm 2</math></b><br>137.7     | <b><math>84 \pm 3</math></b><br>85.9 |

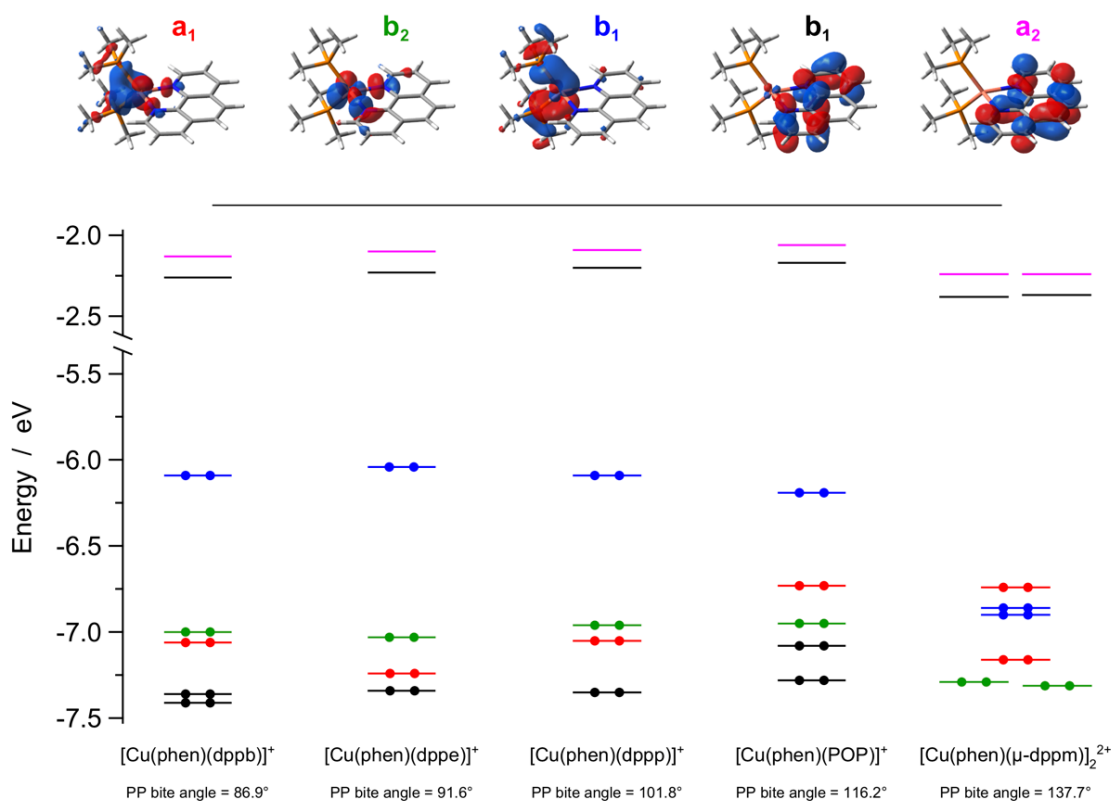

**Figure S5.** Energy diagram showing the frontier Kohn–Sham molecular orbitals of the five complexes belonging to the  $[\text{Cu}(\text{phen})(\text{PP})]^+$  series. Data refer to PCM-M06 single-point calculations in dichloromethane, using molecular geometry previously optimized in vacuum (see Experimental Section for further details). Each frontier molecular orbital belonging to the real  $[\text{Cu}(\text{phen})(\text{PP})]^+$  complexes has been associated to the ones already described for the model compound  $[\text{Cu}(\text{phen})(\text{PMe}_3)_2]^+$  in  $C_{2v}$  symmetry (according to its nature and topology) colored following the legend depicted in Figure 4 and also reported in the top part of this figure.

Please note that the simple model based on the sole P–Cu–P angle variation in the  $C_{2v}$ - $[\text{Cu}(\text{phen})(\text{PMe}_3)_2]^+$  complex (see Figure 4 main text) is able to justify: (i) the flipping between the  $a_1$ - (red) and  $b_2$ -type orbitals (green) by passing from  $[\text{Cu}(\text{phen})(\text{dppp})]^+$  to  $[\text{Cu}(\text{phen})(\text{POP})]^+$  and (ii) the flipping between the abovementioned  $a_1$ -type orbital and the  $b_1$ -type one (blue), when exceeding the PP bite-angle limit of approx.  $135^\circ$  (as in  $[\text{Cu}(\text{phen})(\mu\text{-dppm})]_2^{2+}$  dinuclear complex).

**Table S3.** Selected electrochemical data and calculated DFT energies of the frontier molecular orbitals for the  $[\text{Cu}(\text{phen})(\text{PP})]^+$  series in  $\text{CH}_2\text{Cl}_2$ .

| Sample                                             | Electrochemical data <sup>a</sup><br>[V] |                     |                           | DFT calculated energy <sup>b</sup><br>[eV] |                   |                         |
|----------------------------------------------------|------------------------------------------|---------------------|---------------------------|--------------------------------------------|-------------------|-------------------------|
|                                                    | $E_{\text{ox}}$                          | $E_{\text{red}}$    | $\Delta E_{\text{redox}}$ | $E_{\text{HOMO}}$                          | $E_{\text{LUMO}}$ | $\Delta E_{\text{DFT}}$ |
| $[\text{Cu}(\text{phen})(\text{dppb})]^+$          | + 1.05 <sup>c</sup>                      | – 1.50              | 2.55                      | – 6.09                                     | – 2.26            | 3.83                    |
| $[\text{Cu}(\text{phen})(\text{dppe})]^+$          | + 1.04 <sup>d</sup>                      | – 1.53              | 2.57                      | – 6.04                                     | – 2.23            | 3.81                    |
| $[\text{Cu}(\text{phen})(\text{dppp})]^+$          | + 1.07 <sup>c</sup>                      | – 1.55              | 2.62                      | – 6.09                                     | – 2.20            | 3.89                    |
| $[\text{Cu}(\text{phen})(\text{POP})]^+$           | + 1.29                                   | – 1.58 <sup>c</sup> | 2.87                      | – 6.19                                     | – 2.17            | 4.02                    |
| $[\text{Cu}(\text{phen})(\mu\text{-dppm})]_2^{2+}$ | + 1.44                                   | – 1.35              | 2.79                      | – 6.74                                     | – 2.38            | 4.36                    |

<sup>a</sup>Data refer to OSWV or CV experiments; ferrocene is used as internal reference ( $\text{Fc}^+/\text{Fc}$  is observed at  $0.550 \pm 0.001$  V vs. SCE).  $E_{\text{ox}}$  = first oxidation potential,  $E_{\text{red}}$  = first reduction potential in V vs SCE. The electrochemical energy gap  $\Delta E_{\text{redox}}$  in V is obtained from:  $\Delta E_{\text{redox}} = E_{\text{ox}} - E_{\text{red}}$ . The LUMO and HOMO energy levels can be calculated in eV using the following equations:  $E_{\text{LUMO}} = -(E_{\text{red}} + 4.8)$ ,  $E_{\text{HOMO}} = -(E_{\text{ox}} + 4.8)$ . <sup>b</sup>Data refer to the energy calculation performed in  $\text{CH}_2\text{Cl}_2$  using a fully optimized structure in vacuum (see Experimental Part), with the theoretical energy gap:  $\Delta E_{\text{DFT}} = E_{\text{LUMO}} - E_{\text{HOMO}}$ . <sup>c</sup>Quasi-reversible process at  $0.1 \text{ V s}^{-1}$ . <sup>d</sup>Shoulder at +0.93 V and peak at +1.44 V appear and increase during the experiment. <sup>e</sup>Quasi-reversible process at  $1 \text{ V s}^{-1}$ .

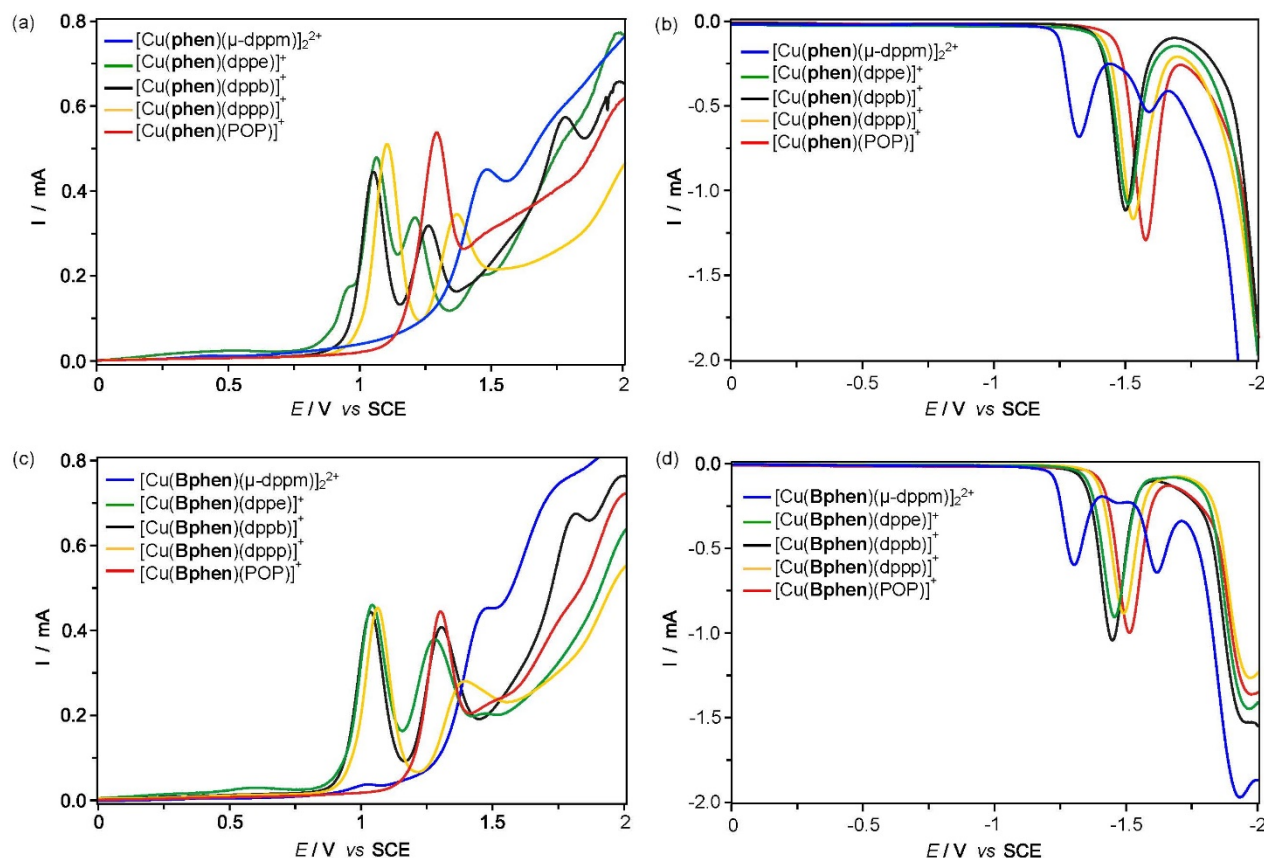

**Figure S6.** OSWVs of  $[\text{Cu}(\text{phen})(\text{PP})]^+$  (anodic (a) and cathodic (b) scans) and of  $[\text{Cu}(\text{Bphen})(\text{PP})]^+$  (anodic (c) and cathodic (d) scans) on a Pt electrode in  $\text{CH}_2\text{Cl}_2 + 0.1 \text{ M } [n\text{Bu}_4\text{N}][\text{BF}_4]$  at room temperature (frequency 20 Hz, amplitude 20 mV, step potential 5 mV).



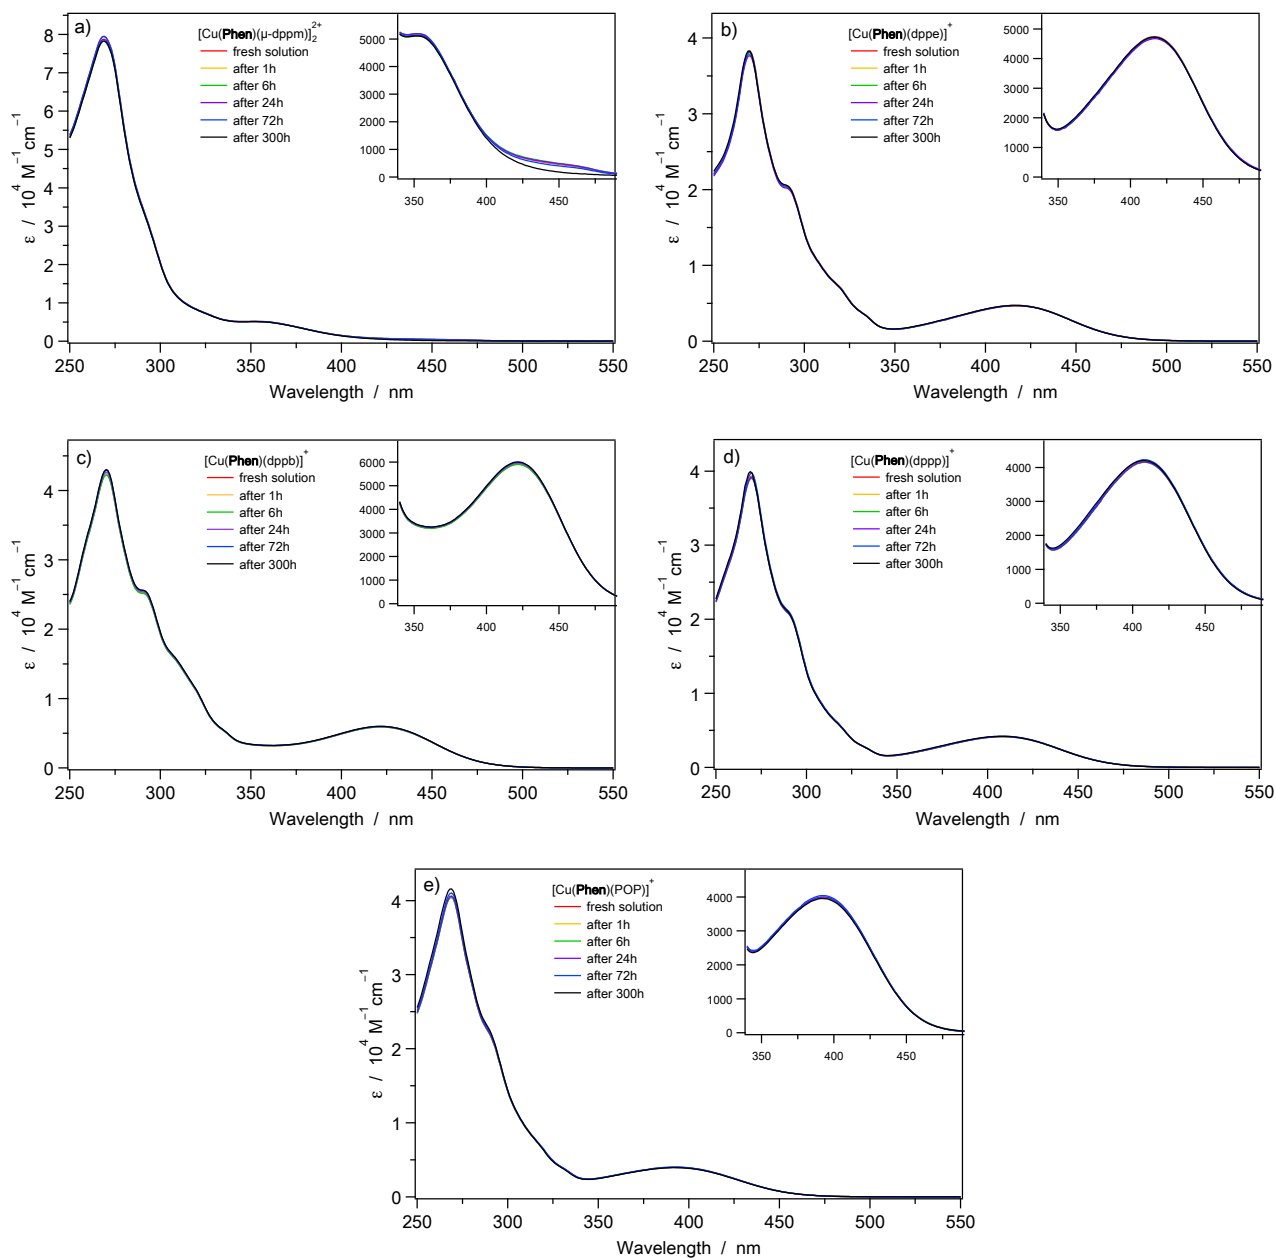

**Figure S7.** Absorption spectra of (a)  $[\text{Cu}(\text{phen})(\mu\text{-dppm})]_2^{2+}$ , (b)  $[\text{Cu}(\text{phen})(\text{dppe})]^+$ , (c)  $[\text{Cu}(\text{phen})(\text{dppb})]^+$ , (d)  $[\text{Cu}(\text{phen})(\text{dppp})]^+$ , (e)  $[\text{Cu}(\text{phen})(\text{POP})]^+$  in  $\text{CH}_2\text{Cl}_2$  at 298 K taken at several time intervals after sample solubilization.

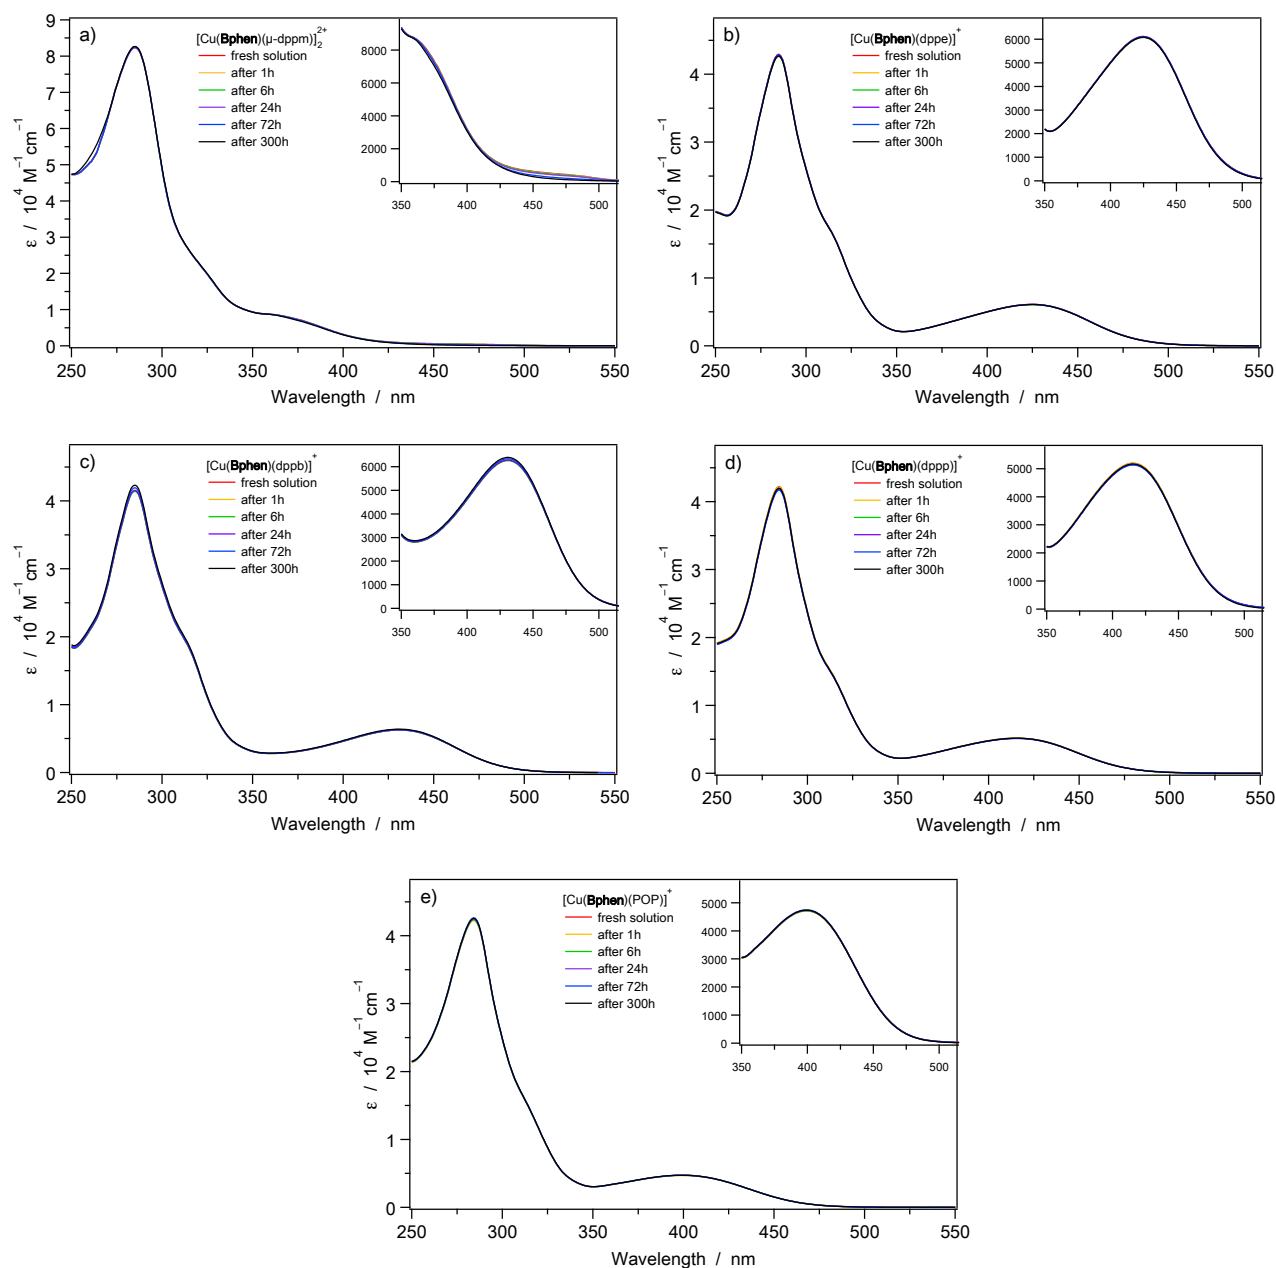

**Figure S8.** Absorption spectra of (a)  $[\text{Cu}(\text{Bphen})(\mu\text{-dppm})]_2^{2+}$ , (b)  $[\text{Cu}(\text{Bphen})(\text{dppe})]^+$ , (c)  $[\text{Cu}(\text{Bphen})(\text{dppb})]^+$ , (d)  $[\text{Cu}(\text{Bphen})(\text{dppp})]^+$ , (e)  $[\text{Cu}(\text{Bphen})(\text{POP})]^+$  in  $\text{CH}_2\text{Cl}_2$  at 298 K taken at several time intervals after sample solubilization.

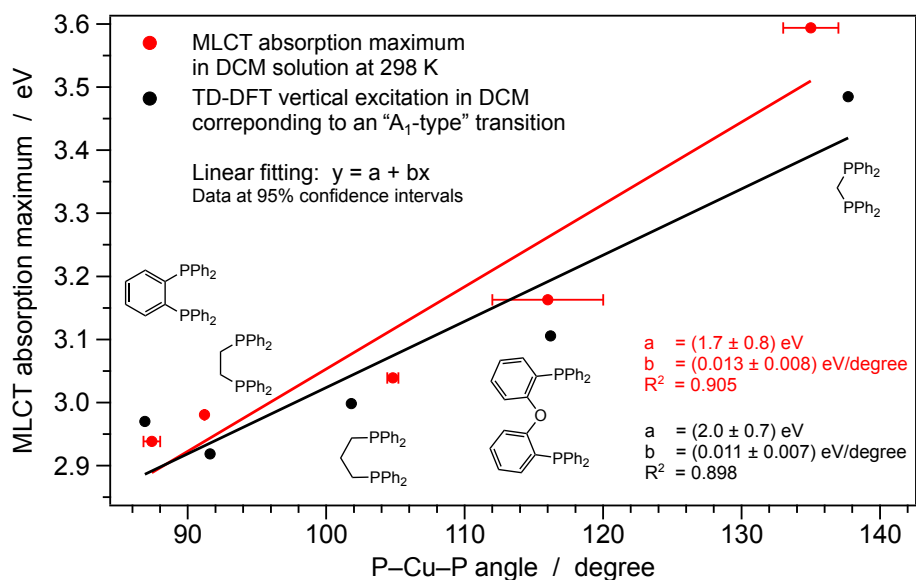

**Figure S9.**  $[\text{Cu}(\text{phen})(\text{PP})]^+$  series. Red line: Linear correlation between the energy of the MLCT absorption maximum and the PP bite angle of the chelating bis-phosphine ligand (data obtained from absorption spectra in dichloromethane and from X-ray crystal structures, respectively). Black line: Same correlation using theoretical data (*i.e.*, “ $A_1$ -type” vertical excitation *vs.* PP bite angle calculated from the ground-state optimized geometry).

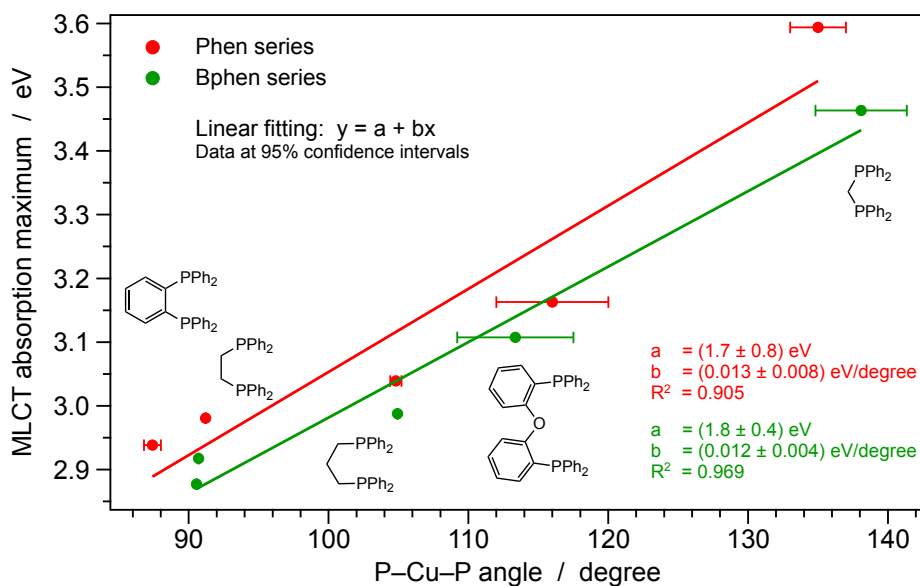

**Figure S10.** Linear correlation between the energy of the MLCT absorption maximum and the PP bite angle of the chelating bis-phosphine ligand (data obtained from absorption spectra in dichloromethane and from X-ray crystal structures, respectively). Red line:  $[\text{Cu}(\text{phen})(\text{PP})]^+$  series; Green line:  $[\text{Cu}(\text{Bphen})(\text{PP})]^+$  series.

**Table S4.** Photophysical Data in CH<sub>2</sub>Cl<sub>2</sub> at 298 K and in frozen solution at 77 K.

| Complex                                                 | CH <sub>2</sub> Cl <sub>2</sub> at 298 K |                                                                 |                               |                          |                             |                                             |                                                       | CH <sub>2</sub> Cl <sub>2</sub> at 77 K |                                         |
|---------------------------------------------------------|------------------------------------------|-----------------------------------------------------------------|-------------------------------|--------------------------|-----------------------------|---------------------------------------------|-------------------------------------------------------|-----------------------------------------|-----------------------------------------|
|                                                         | $\lambda_{\text{MLCT}}$<br>[nm]          | $\epsilon_{\text{MLCT}}$<br>[M <sup>-1</sup> cm <sup>-1</sup> ] | $\lambda_{\text{em}}$<br>[nm] | PLQY <sup>a</sup><br>[%] | $\tau$ <sup>b</sup><br>[μs] | $k_r$<br>[10 <sup>4</sup> s <sup>-1</sup> ] | $k_{\text{nr}}$<br>[10 <sup>4</sup> s <sup>-1</sup> ] | $\lambda_{\text{em}}$<br>[nm]           | $\tau_{\text{av}}$ <sup>c</sup><br>[μs] |
| [Cu( <b>phen</b> )(dppb)] <sup>+</sup>                  | 422                                      | 5910                                                            | <sup>d</sup>                  |                          |                             |                                             |                                                       | 615                                     | 190.6                                   |
| [Cu( <b>phen</b> )(dppe)] <sup>+</sup>                  | 416                                      | 4750                                                            | <sup>d</sup>                  |                          |                             |                                             |                                                       | 652                                     | 160.5                                   |
| [Cu( <b>phen</b> )(dppp)] <sup>+</sup>                  | 408                                      | 4190                                                            | <sup>d</sup>                  |                          |                             |                                             |                                                       | 622                                     | 158.5                                   |
| [Cu( <b>phen</b> )(POP)] <sup>+</sup>                   | 392                                      | 3990                                                            | 690                           | 0.10                     | 200                         | 0.50                                        | 5000                                                  | 587                                     | 132.1                                   |
| [Cu( <b>phen</b> )(μ-dppm)] <sub>2</sub> <sup>2+</sup>  | 345 <sup>sh</sup> /450 <sup>sh</sup>     | 2340/550                                                        | 653                           | 0.06                     | 184                         | 0.33                                        | 5430                                                  | 560                                     | 146.6                                   |
| [Cu( <b>Bphen</b> )(dppb)] <sup>+</sup>                 | 431                                      | 6300                                                            | <sup>d</sup>                  |                          |                             |                                             |                                                       | 640                                     | 199.1                                   |
| [Cu( <b>Bphen</b> )(dppe)] <sup>+</sup>                 | 425                                      | 6180                                                            | <sup>d</sup>                  |                          |                             |                                             |                                                       | 650                                     | 160.6                                   |
| [Cu( <b>Bphen</b> )(dppp)] <sup>+</sup>                 | 415                                      | 4850                                                            | <sup>d</sup>                  |                          |                             |                                             |                                                       | 643                                     | 183.4                                   |
| [Cu( <b>Bphen</b> )(POP)] <sup>+</sup>                  | 399                                      | 4910                                                            | 640                           | 0.13                     | 203                         | 0.64                                        | 4920                                                  | 610                                     | 145.4                                   |
| [Cu( <b>Bphen</b> )(μ-dppm)] <sub>2</sub> <sup>2+</sup> | 360 <sup>sh</sup> /475 <sup>sh</sup>     | 8820/610                                                        | 653                           | 0.04                     | <sup>e</sup>                |                                             |                                                       | 585                                     | 159.5                                   |

<sup>a</sup>Measured with respect to [Ru(bpy)<sub>3</sub>]<sup>2+</sup> as standard (PLQY = 0.028);  $\lambda_{\text{em}}$  = 380 nm. <sup>b</sup> $\lambda_{\text{em}}$  = 373 nm;  $k_r$  = PLQY/ $\tau$  and  $k_{\text{nr}}$  = 1/ $\tau$  –  $k_r$ . <sup>c</sup> $\lambda_{\text{em}}$  = 370 nm; emission lifetime reported as average of biexponential decay. <sup>d</sup>Luminescence not detectable. <sup>e</sup>Faint luminescence prevents the determination of the emission lifetime.

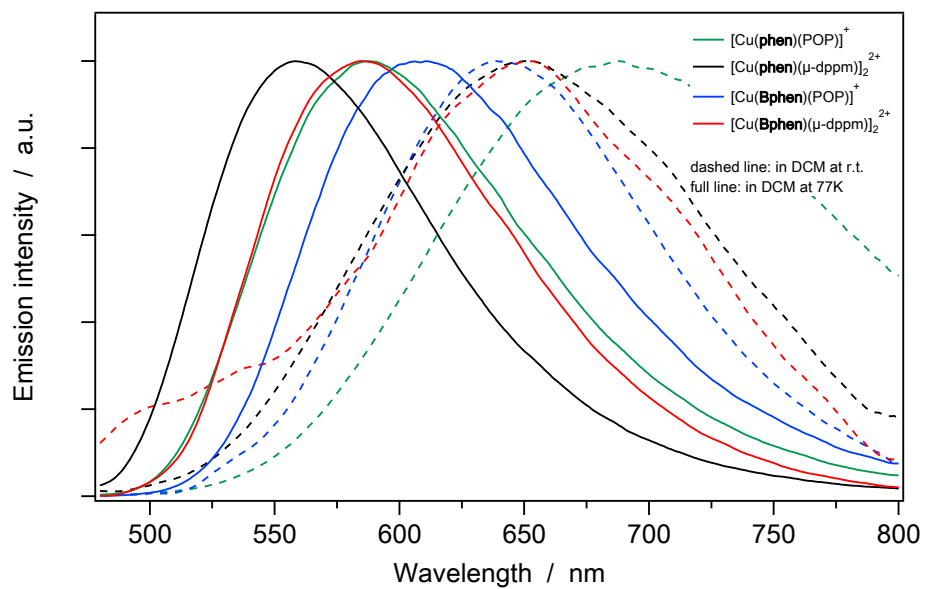

**Figure S11.** Comparison between luminescence spectra at 298 K (dashed lines) and at 77 K (full lines) in  $\text{CH}_2\text{Cl}_2$  solution and rigid matrix respectively;  $\lambda_{\text{exc}} = 380$  nm.

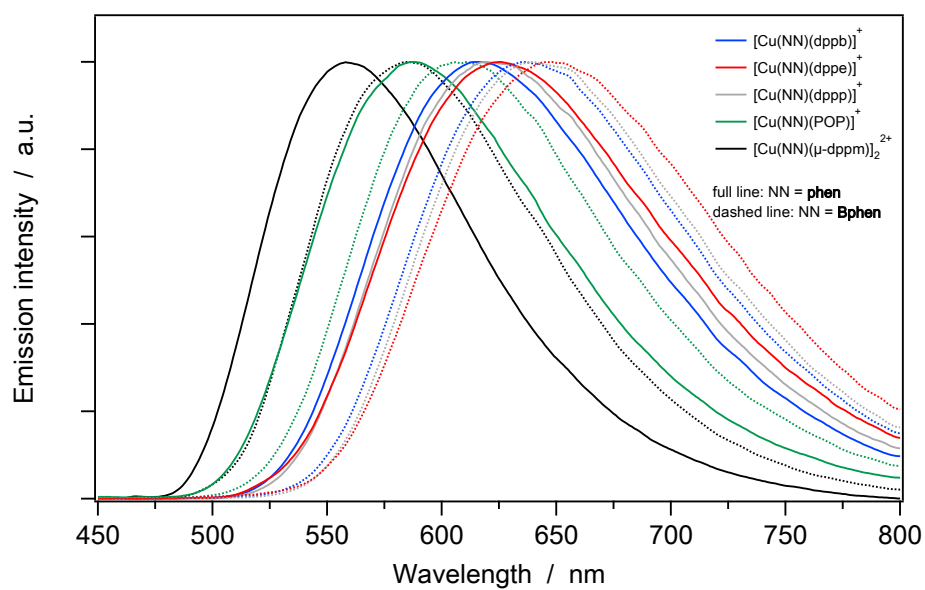

**Figure S12.** Luminescence spectra at 77 K in  $\text{CH}_2\text{Cl}_2$  rigid matrix;  $\lambda_{\text{exc}} = 380$  nm.

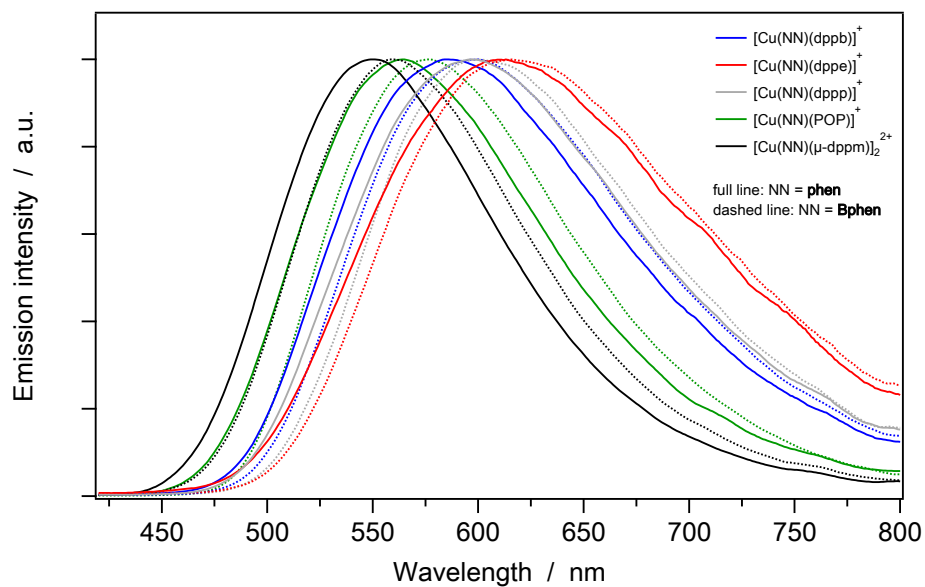

**Figure S13.** Luminescence spectra in PMMA 1 wt% at 298 K;  $\lambda_{\text{exc}} = 380$  nm.

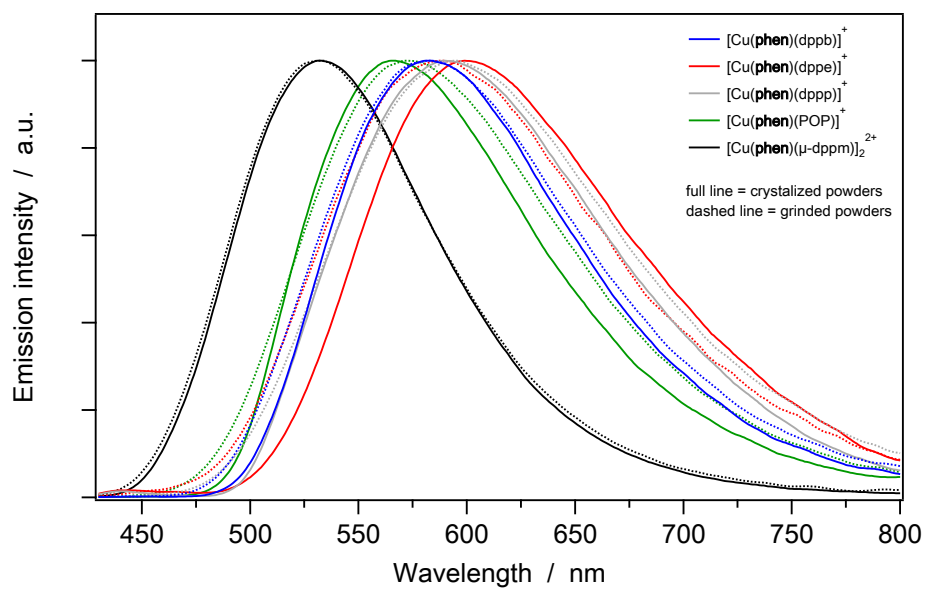

**Figure S14.** Luminescence spectra of  $[\text{Cu}(\text{phen})(\text{PP})]^+$  series, comparison between as crystallized powders samples (full lines) and grinded powder samples (dashed lines);  $\lambda_{\text{exc}} = 380$  nm.

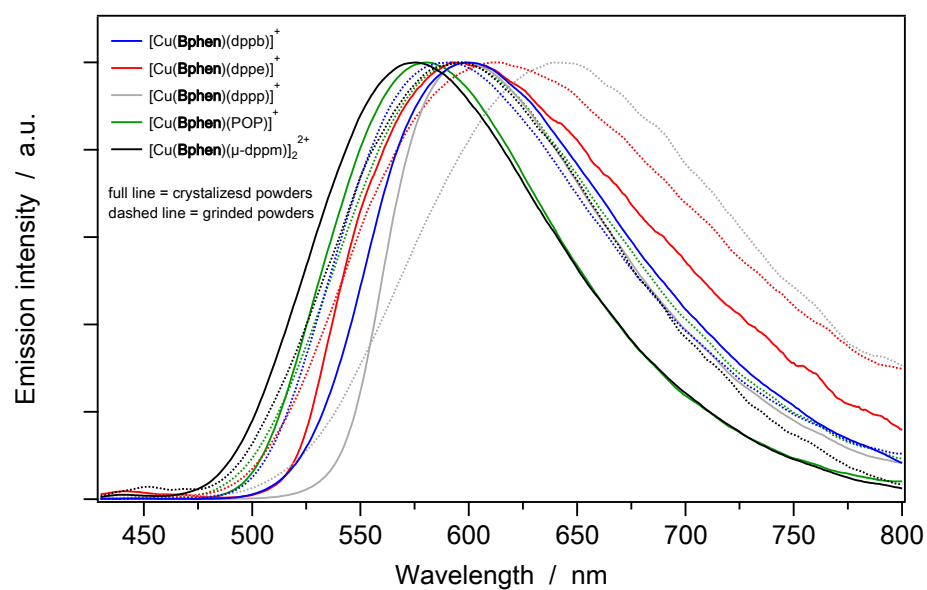

**Figure S15.** Luminescence spectra of  $[\text{Cu}(\text{Bphen})(\text{PP})]^+$  series, comparison between as crystallized powders samples (full lines) and grinded powder samples (dashed lines);  $\lambda_{\text{exc}} = 380 \text{ nm}$ .

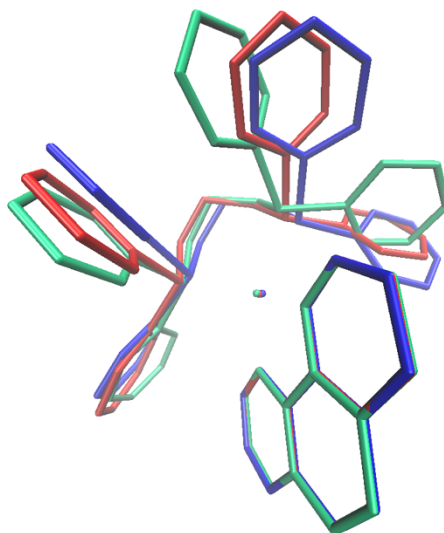

**Figure S16.** Superimposition of some selected  $T_1$  minimum conformers of the  $[\text{Cu}(\text{phen})(\text{dppp})]^+$  complex in its lowest triplet state ( $T_1$ ), calculated at the M06 level of theory in vacuum (see Experimental Section for further details). All structures are superimposed by minimizing the root-mean-square deviation of all the atoms of the phenanthroline ligand; hydrogen atoms are excluded from the statistic and omitted in the figure. All  $T_1$  conformers are virtually degenerate (*i.e.*, the energy difference between the highest- and lowest-energy conformer is less than 0.005 eV). The adiabatic energy difference between  $S_0$  and  $T_1$  is 2.17 eV (*i.e.*, 570 nm).

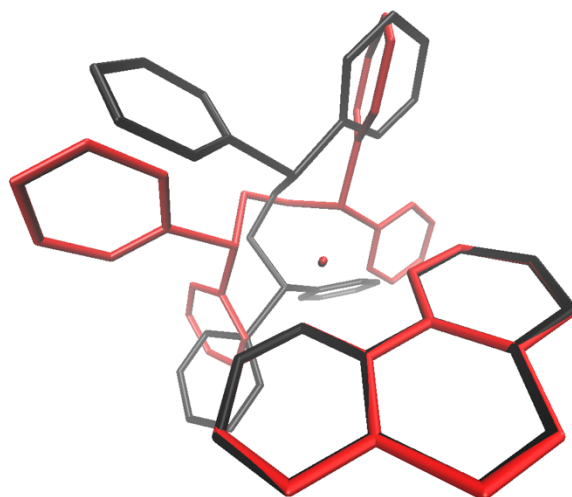

**Figure S17.** Superimposition of the ground-state geometry (black) of the  $[\text{Cu}(\text{phen})(\text{dppe})]^+$  complex and the one of its most stable  $T_1$  conformer (red), which displays an almost ideal square-planar coordination around the copper ion. Both geometries are fully optimized at the M06 level of theory in vacuum (see Experimental Section for further details). In order to clearly highlight the flattening distortion occurring when the complex is excited from  $S_0$  to the  $T_1$  MLCT state, the two structures are superimposed by minimizing the root-mean-square deviation of all the atoms of the phenanthroline ligand only; hydrogen atoms are excluded from the statistic and omitted in the figure. The adiabatic energy difference between  $S_0$  and  $T_1$  is 1.93 eV (*i.e.*, 640 nm).



**Table S5.** Key structural parameters of the fully-optimized complexes belonging to the  $[\text{Cu}(\text{phen})(\text{PP})]^+$  series (where PP = dppb, dppe, POP and  $\mu$ -dppm). Data refer to both the ground state ( $S_0$ ) and the lowest triplet excited state in its most stable flattened conformation ( $T_1$ ). All the geometry optimizations were performed at the M06 level of theory in vacuum (see Experimental Section for further details).

| Type of PP ligand            |                    | Cu–N bond lengths [Å] | Cu–P bond lengths [Å] | N–Cu–N angle [°] | P–Cu–P angle [°] | phen – PCuP dihedral angle [°] | Flattening distortion between $S_0$ and $T_1$ [°] |
|------------------------------|--------------------|-----------------------|-----------------------|------------------|------------------|--------------------------------|---------------------------------------------------|
| <b>dppb</b>                  | $S_0$              | 2.072 – 2.087         | 2.271 – 2.284         | 81.0             | 86.9             | 85.5                           | 51.4                                              |
|                              | $T_1$ <sup>a</sup> | 1.977                 | 2.333                 | 84.3             | 84.0             | 34.1                           |                                                   |
| <b>dppe</b>                  | $S_0$              | 2.059 – 2.093         | 2.265 – 2.283         | 81.2             | 91.6             | 72.8                           | 69.6                                              |
|                              | $T_1$              | 1.983 – 1.988         | 2.353 – 2.359         | 83.6             | 84.2             | 3.2                            |                                                   |
| <b>dppp</b>                  | $S_0$              | 2.078 – 2.103         | 2.238 – 2.273         | 80.6             | 101.8            | 85.1                           | 46.8                                              |
|                              | $T_1$              | 1.972 – 1.986         | 2.335 – 2.370         | 83.9             | 91.1             | 38.3                           |                                                   |
| <b>POP</b>                   | $S_0$              | 2.101 – 2.108         | 2.243 – 2.318         | 80.1             | 116.2            | 89.2                           | 27.2                                              |
|                              | $T_1$              | 1.959 – 1.980         | 2.326 – 2.365         | 84.7             | 103.8            | 62.0                           |                                                   |
| <b><math>\mu</math>-dppm</b> | $S_0$              | 2.141 – 2.157         | 2.255 – 2.286         | 78.5             | 137.7            | 85.9                           | – 4.1<br>(–2.6)                                   |
|                              | $T_1$ <sup>b</sup> | 1.958 – 2.096         | 2.313 – 2.322         | 84.9             | 151.2            | 90.0                           |                                                   |
|                              |                    | (2.173 – 2.169)       | (2.275 – 2.292)       | (77.8)           | (144.9)          | (88.5)                         |                                                   |

<sup>a</sup> The  $T_1$  minimum-energy geometry turns out to display  $C_2$  symmetry. <sup>b</sup> The  $T_1$  minimum-energy geometry does not display the  $C_i$  symmetry as  $S_0$  minimum; consequently, the two Cu nuclei are no longer equivalent. The excited triplet is localized on one copper center only (data reported in the first row), while the other one almost retains the ground-state geometry (data in brackets).

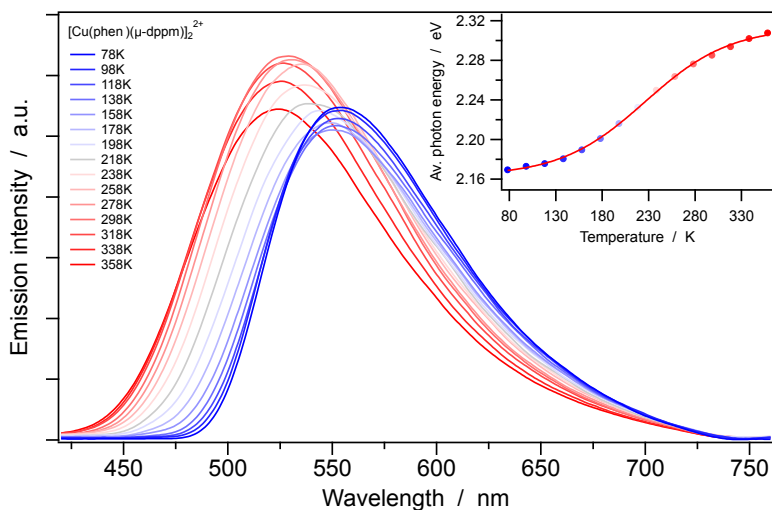

**Figure S18.** Luminescence spectra of  $[\text{Cu}(\text{phen})(\mu\text{-dppm})]_2^{2+}$  as pure powder in the temperature range 78–358 K;  $\lambda_{\text{exc}} = 380$  nm. Inset: variation of the average photon energy as function of the temperature; an estimated  $\Delta E(S_1-T_1)$  of  $(0.15 \pm 0.01)$  eV is calculated by fitting the data with a sigmoid function.

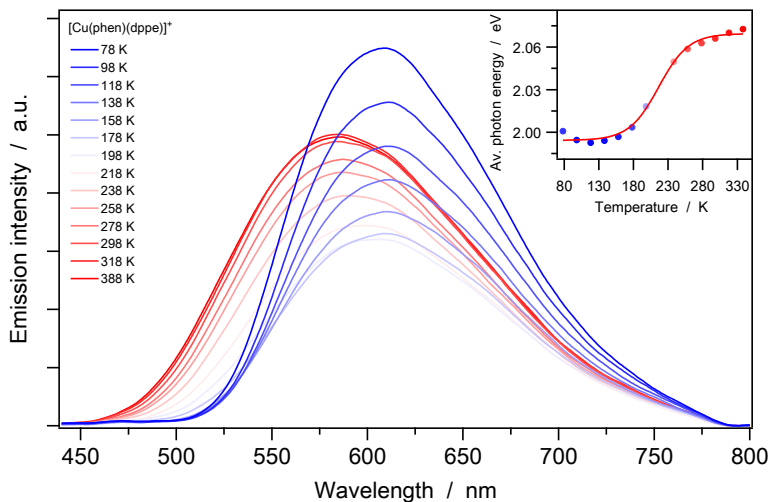

**Figure S19.** Luminescence spectra of  $[\text{Cu}(\text{phen})(\text{dppe})]^+$  as pure powder in the temperature range 78–338 K;  $\lambda_{\text{exc}} = 380$  nm. Inset: variation of the average photon energy as function of the temperature; an estimated  $\Delta E(S_1-T_1)$  of  $(0.075 \pm 0.009)$  eV is calculated by fitting the data with a sigmoid function.

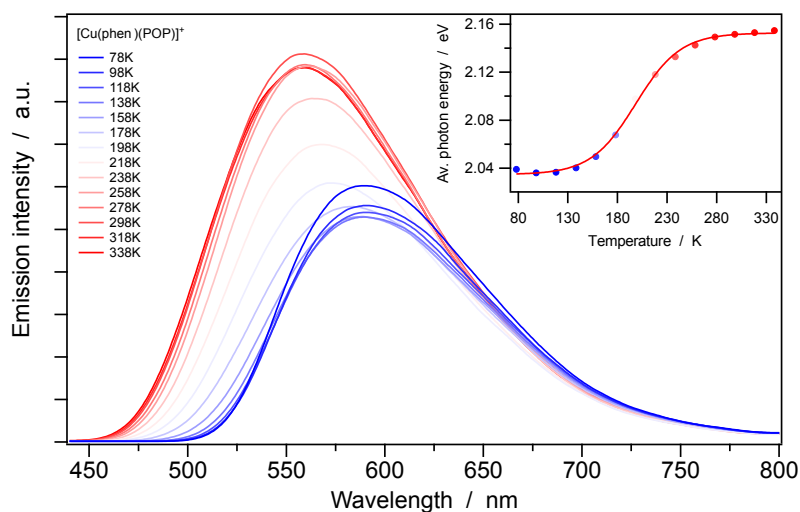

**Figure S20.** Luminescence spectra of  $[\text{Cu}(\text{phen})(\text{POP})]^+$  as pure powder in the temperature range 78–338 K;  $\lambda_{\text{exc}} = 380 \text{ nm}$ . Inset: variation of the average photon energy as function of the temperature; an estimated  $\Delta E(S_1-T_1)$  of  $(0.118 \pm 0.009) \text{ eV}$  is calculated by fitting the data with a sigmoid function.

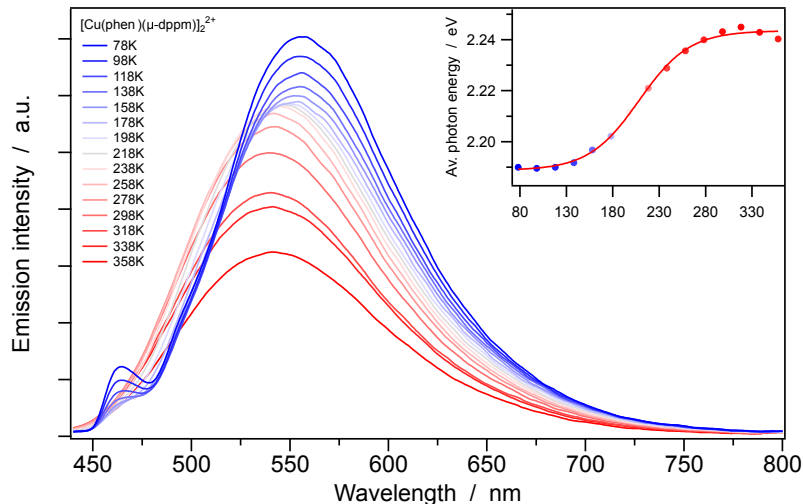

**Figure S21.** Luminescence spectra of  $[\text{Cu}(\text{phen})(\mu\text{-dppm})]_2^{2+}$  in PMMA matrix (1 wt%) in the temperature range 78–358 K;  $\lambda_{\text{exc}} = 380 \text{ nm}$ . Inset: variation of the average photon energy as function of the temperature; an estimated  $\Delta E(S_1-T_1)$  of  $(0.055 \pm 0.005) \text{ eV}$  is calculated by fitting the data with a sigmoid function.

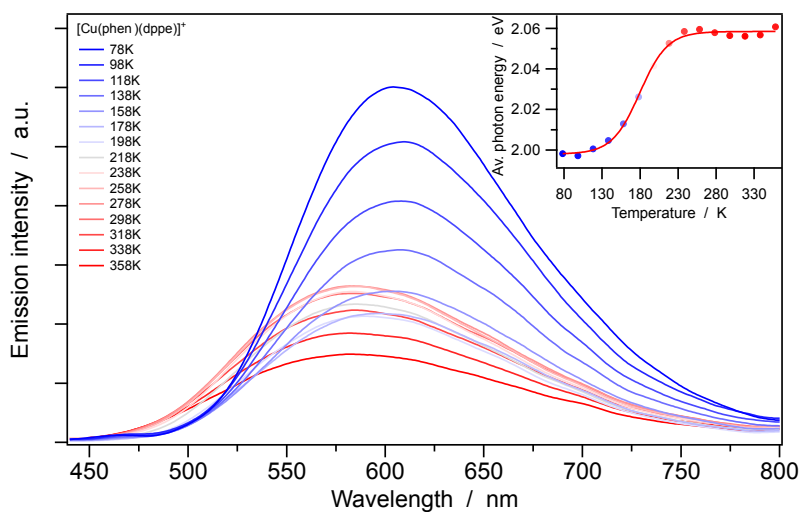

**Figure S22.** Luminescence spectra of  $[\text{Cu}(\text{phen})(\text{dppe})]^+$  in PMMA matrix (1 wt%) in the temperature range 78–358 K;  $\lambda_{\text{exc}} = 380$  nm. Inset: variation of the average photon energy as function of the temperature; an estimated  $\Delta E(S_1-T_1)$  of  $(0.060 \pm 0.005)$  eV is calculated by fitting the data with a sigmoid function.

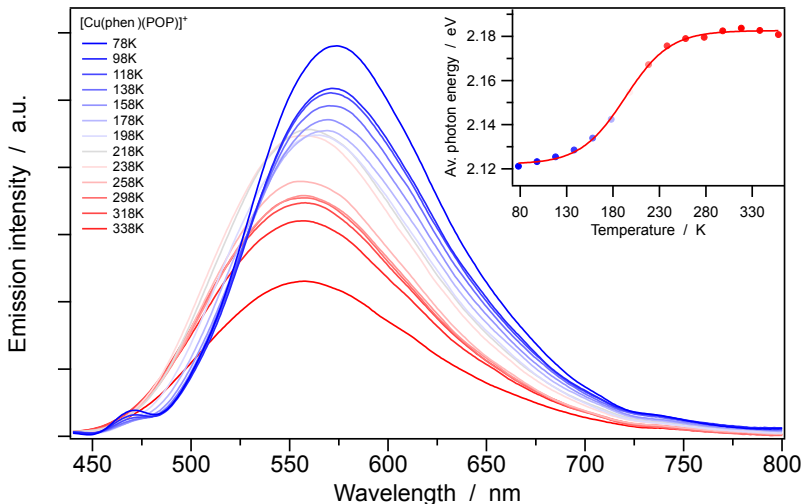

**Figure S23.** Luminescence spectra of  $[\text{Cu}(\text{phen})(\text{POP})]^+$  in PMMA matrix (1 wt%) in the temperature range 78–358 K;  $\lambda_{\text{exc}} = 380$  nm. Inset: variation of the average photon energy as function of the temperature; an estimated  $\Delta E(S_1-T_1)$  of  $(0.061 \pm 0.004)$  eV is calculated by fitting the data with a sigmoid function.

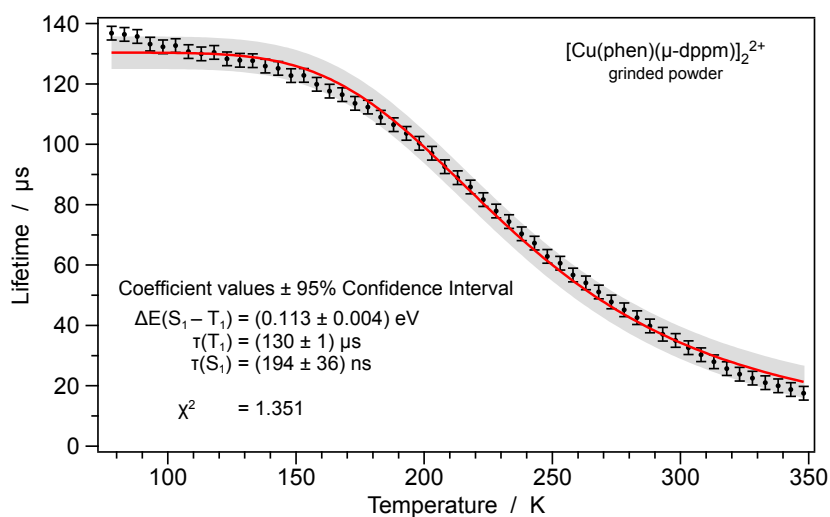

**Figure S24.** Temperature-dependent excited-state lifetimes ( $\tau$ ) of  $[\text{Cu}(\text{phen})(\mu\text{-dppm})]_2^{2+}$  as pure powder, recorded in the range 78–348 K;  $\lambda_{\text{exc}} = 380$  nm. The red line fitting the experimental points is calculated according to using eq 1; the gray region is the prediction interval at 95% confidence; the fitting parameters reported in the graph are the same as in Table 4.

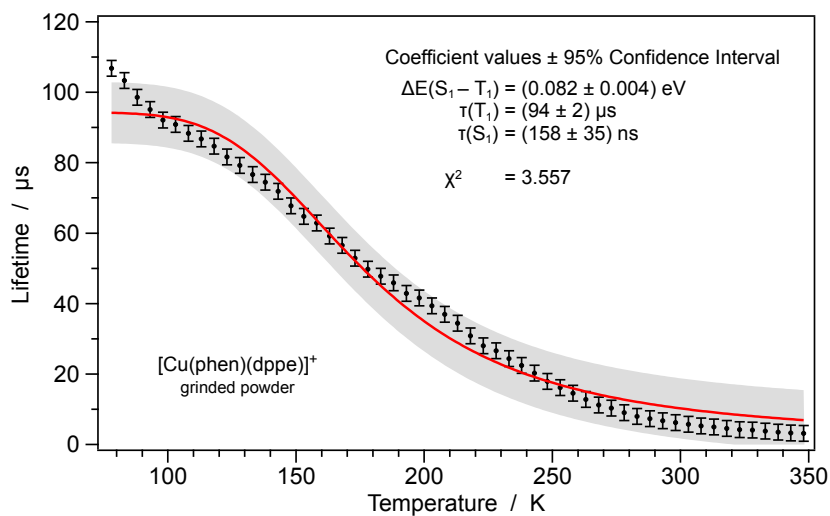

**Figure S25.** Temperature-dependent excited-state lifetimes ( $\tau$ ) of  $[\text{Cu}(\text{phen})(\text{dppe})]^+$  as pure powder, recorded in the range 78–348 K;  $\lambda_{\text{exc}} = 380$  nm. The red line fitting the experimental points is calculated according to using eq 1; the gray region is the prediction interval at 95% confidence; the fitting parameters reported in the graph are the same as in Table 4.

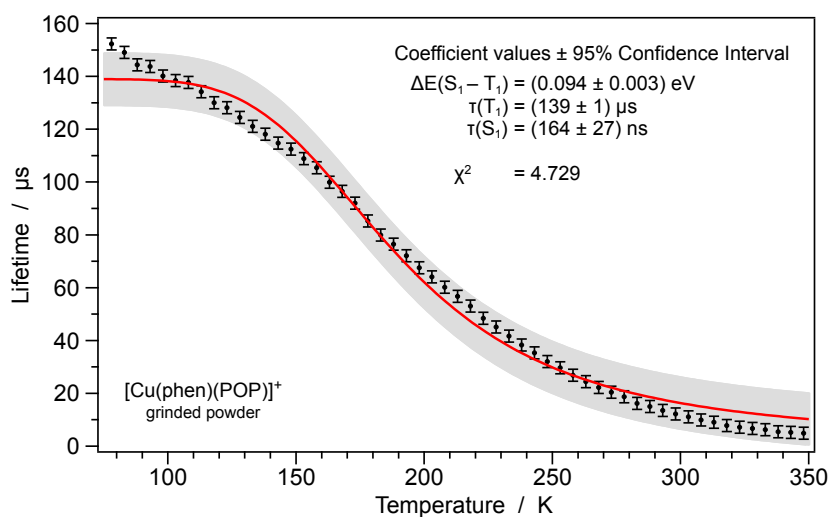

**Figure S26.** Temperature-dependent excited-state lifetimes ( $\tau$ ) of  $[\text{Cu}(\text{phen})(\text{POP})]^+$  as pure powder, recorded in the range 78–348 K;  $\lambda_{\text{exc}} = 380$  nm. The red line fitting the experimental points is calculated according to using eq 1; the gray region is the prediction interval at 95% confidence; the fitting parameters reported in the graph are the same as in Table 4.

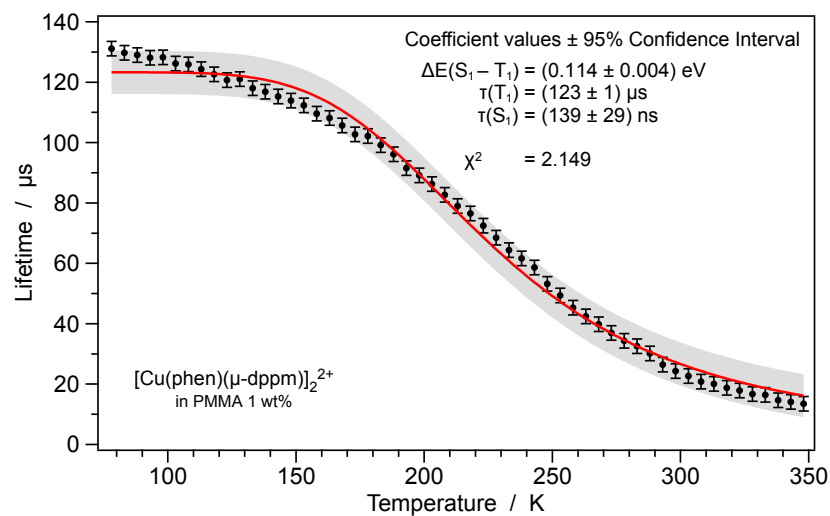

**Figure S27.** Temperature-dependent excited-state lifetimes ( $\tau$ ) of  $[\text{Cu}(\text{phen})(\mu\text{-dppm})]^{2+}$  in PMMA matrix (1 wt%), recorded in the range 78–348 K;  $\lambda_{\text{exc}} = 380$  nm. The red line fitting the experimental points is calculated according to using eq 1; the gray region is the prediction interval at 95% confidence; the fitting parameters reported in the graph are the same as in Table 4.

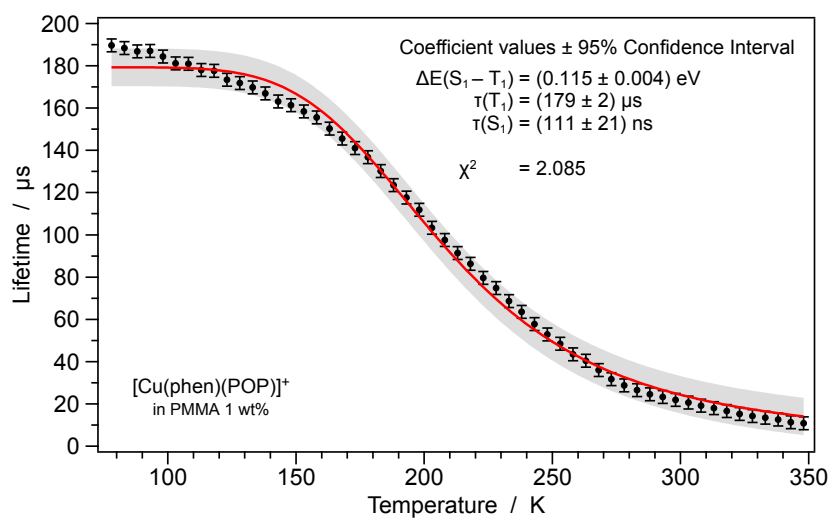

**Figure S28.** Temperature-dependent excited-state lifetimes ( $\tau$ ) of  $[\text{Cu}(\text{phen})(\text{POP})]^+$  in PMMA matrix (1 wt%), recorded in the range 78–348 K;  $\lambda_{\text{exc}} = 380 \text{ nm}$ . The red line fitting the experimental points is calculated according to using eq 1; the gray region is the prediction interval at 95% confidence; the fitting parameters reported in the graph are the same as in Table 4.
